# Supplementary material
Source: PubMed Central journal article supplement (PMC2991091)
Supplement: NIHMS233234-supplement-7.pdf [file NIHMS233234-supplement-7.pdf]

## Electronic supplementary material

**ESM Table 1** Primers used for genotyping

|                                                |                |                                   |
|------------------------------------------------|----------------|-----------------------------------|
| <i>Cre</i> genomic DNA                         | Forward primer | CTG CCA CGA CCA AGT GAC AGC       |
|                                                | Reverse primer | CTT CTC TAC ACC TGC CGT GCT       |
| Conditional <i>Gsk-3<math>\beta</math></i> PCR | Forward primer | GGG GCA ACC TTA ATT TCA TT        |
|                                                | Reverse primer | TCT GGG CTA TAG CTA TCT AGT AAC G |
