# Supplementary material
Source: PubMed Central journal article supplement (PMC2991091)
Supplement: NIHMS233234-supplement-8.pdf [file NIHMS233234-supplement-8.pdf]

**Electronic supplementary material****ESM Table 2** Antibodies used in the experiments

|                                                                  | <b>First antibody (supplier)</b>                                                           | <b>Second antibody (supplier)</b>                              |
|------------------------------------------------------------------|--------------------------------------------------------------------------------------------|----------------------------------------------------------------|
| Immunohistochemical analysis                                     | Insulin (Dako, Carpenteria, CA, USA)                                                       | FITC-conjugated (Jackson ImmunoResearch, West Grove, PA, USA)  |
|                                                                  | Glucagon (Sigma Aldrich, St Charles, MO, USA)                                              | FITC-conjugated (Jackson ImmunoResearch, West Grove, PA, USA)  |
|                                                                  | Ki67 (Zymed Laboratories/Invitrogen, Carlsbad CA, USA)                                     | Cy3-conjugated (Jackson ImmunoResearch, West Grove, PA, USA)   |
|                                                                  | GSK-3 $\beta$ (BD Transduction Laboratories, San Jose, CA, USA)                            | Histomouse-SP (Zymed Laboratories/Invitrogen Carlsbad CA, USA) |
| Western blotting                                                 | Total GSK-3 $\alpha/\beta^a$ (BD Transduction Laboratories, San Jose, CA, USA)             |                                                                |
|                                                                  | Phospho-Akt <sup>a</sup> (Ser473) (BD Transduction Laboratories, San Jose, CA, USA)        |                                                                |
|                                                                  | Total Akt <sup>a</sup> (BD Transduction Laboratories, San Jose, CA, USA)                   |                                                                |
|                                                                  | Total GSK-3 $\beta^a$ (BD Transduction Laboratories, San Jose, CA, USA)                    |                                                                |
|                                                                  | Phosphorylated GS on Ser 641 and 645 <sup>a</sup> (Biosource/Invitrogen, Carlsbad CA, USA) |                                                                |
|                                                                  | IRS1 <sup>a</sup> (Upstate, Lake Placid, NY, USA)                                          |                                                                |
|                                                                  | IRS2 <sup>a</sup> (Upstate, Lake Placid, NY, USA),                                         |                                                                |
|                                                                  | PDX1 <sup>a</sup> (Santa Cruz Biotechnology, Santa Cruz, CA, USA; SC14664)                 |                                                                |
|                                                                  | $\alpha$ -Tubulin <sup>a</sup> (Sigma-Aldrich, St Charles, MO, USA)                        |                                                                |
| $\beta$ -Actin <sup>a</sup> (Sigma-Aldrich, St Charles, MO, USA) |                                                                                            |                                                                |

\*Horseradish peroxide-conjugated
