# Supplementary material
Source: PubMed Central journal article supplement (PMC2991091)

Gsk-3 $\beta$

Glucagon

Gsk-3 $\beta$ , Glucagon

*Rip-Cre control*

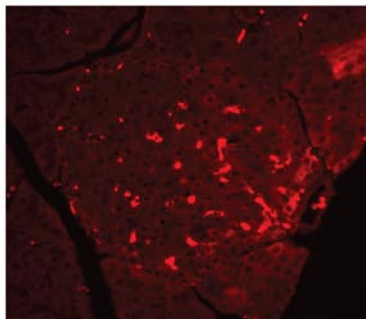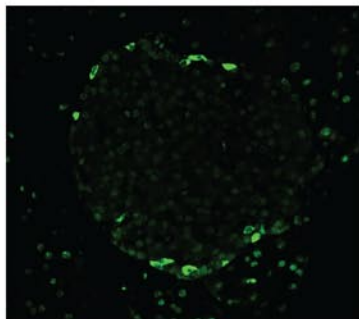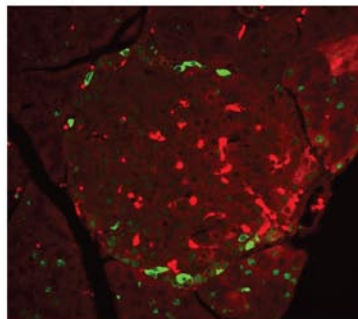

*$\beta$ Gsk-3 $\beta$ <sup>-/-</sup>*

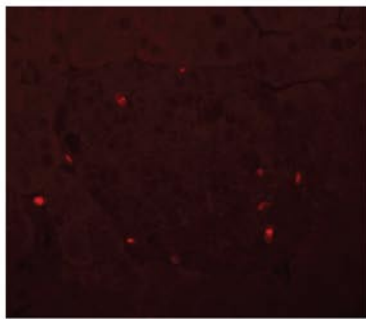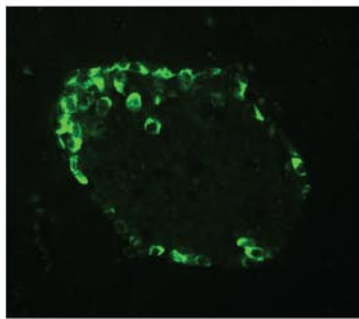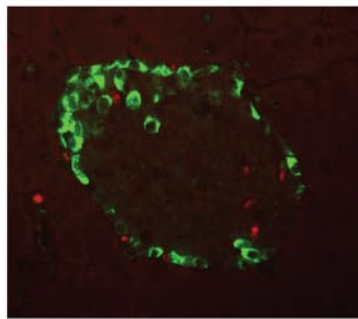

Supplement: NIHMS233234-supplement-1.pdf [file NIHMS233234-supplement-1.pdf]

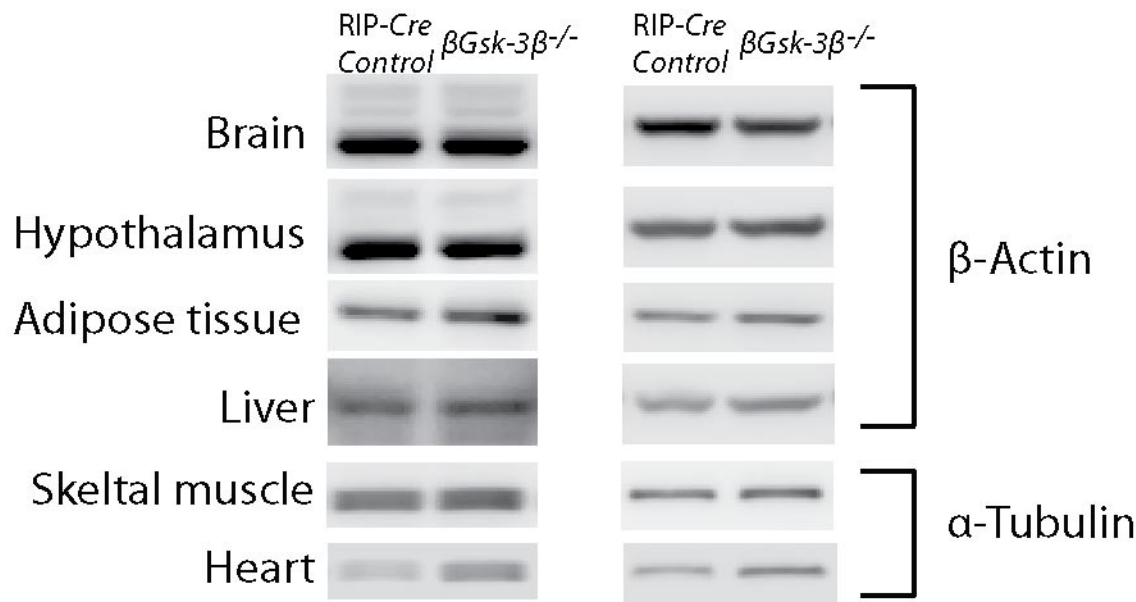

Supplement: NIHMS233234-supplement-2.pdf [file NIHMS233234-supplement-2.pdf]

A.

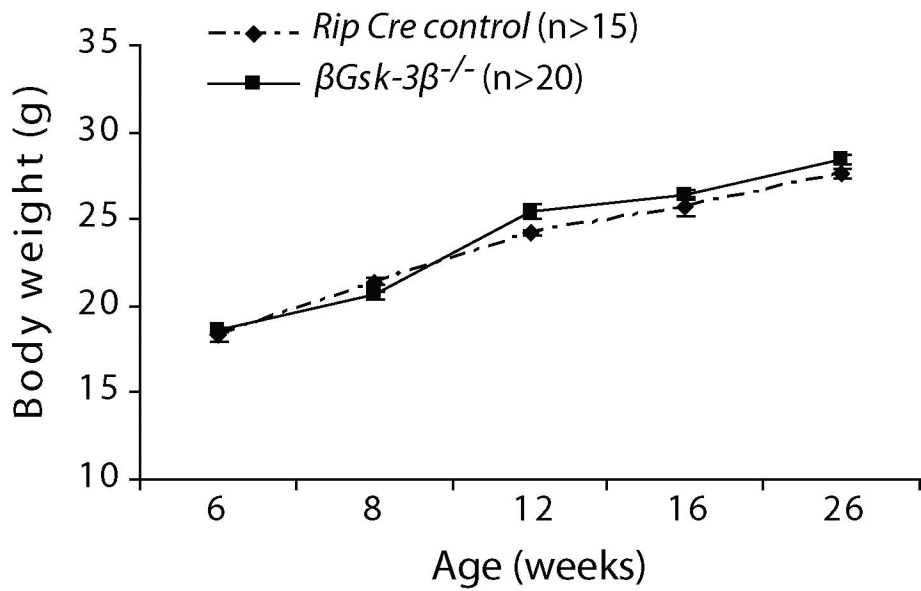

B.

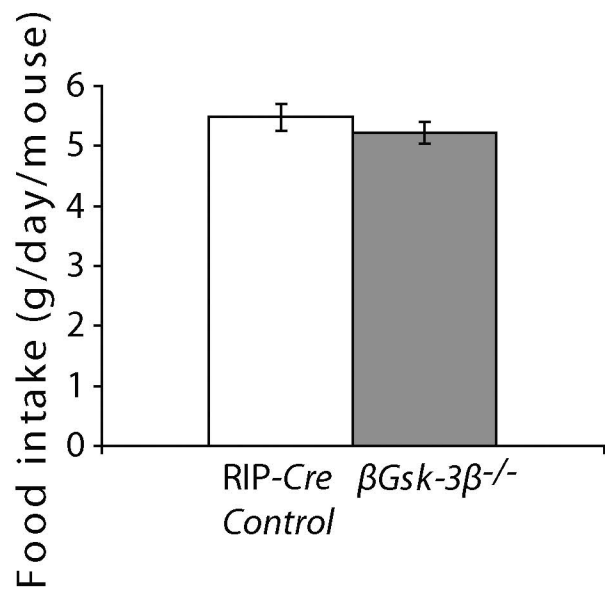

Supplement: NIHMS233234-supplement-3.pdf [file NIHMS233234-supplement-3.pdf]

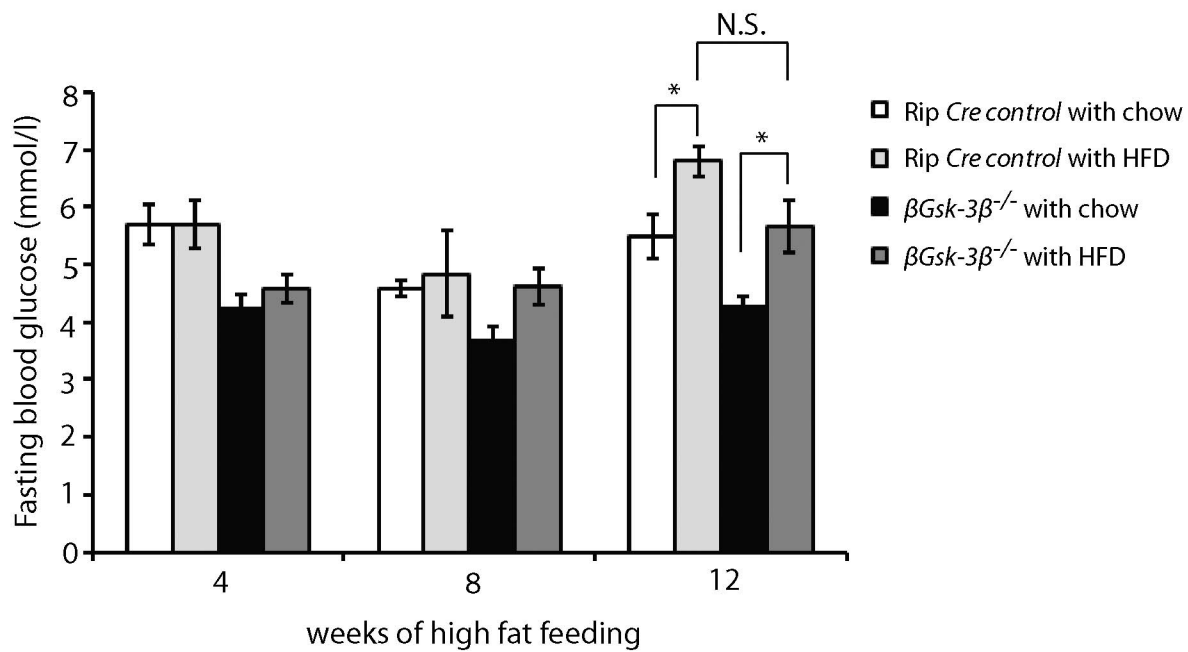

Supplement: NIHMS233234-supplement-4.pdf [file NIHMS233234-supplement-4.pdf]

A.

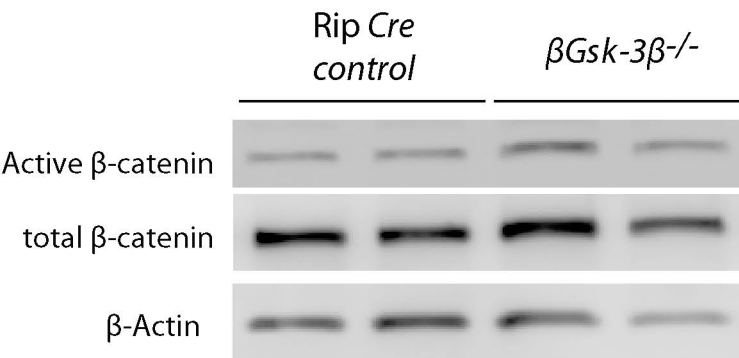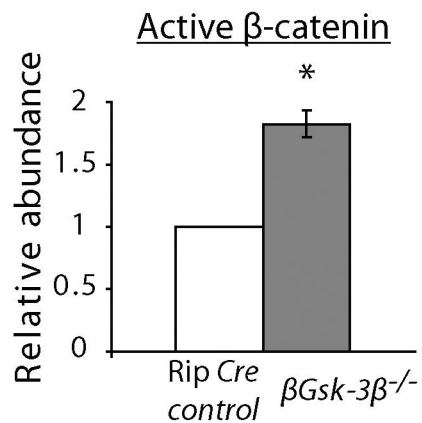

B.

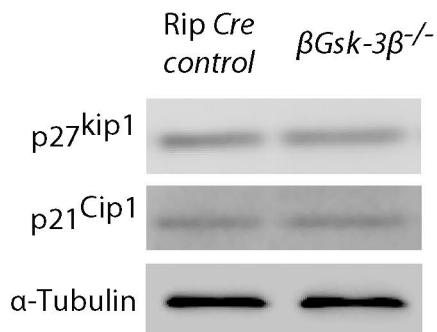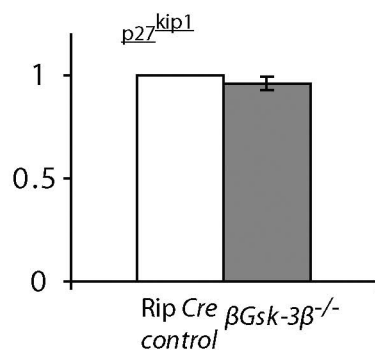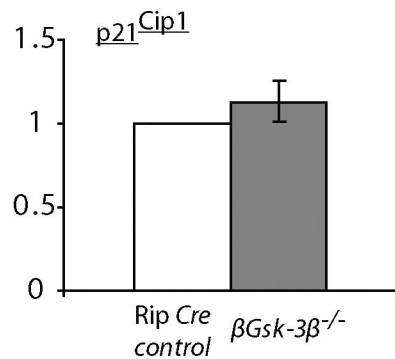

Supplement: NIHMS233234-supplement-5.pdf [file NIHMS233234-supplement-5.pdf]

A

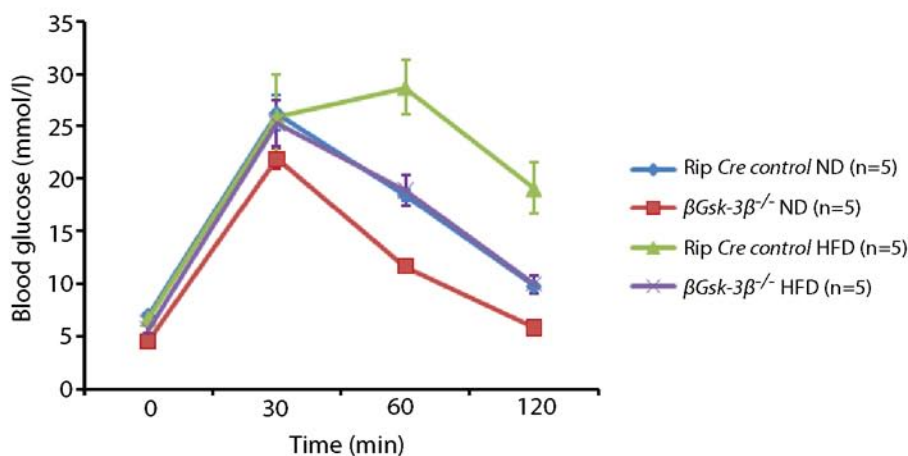

B

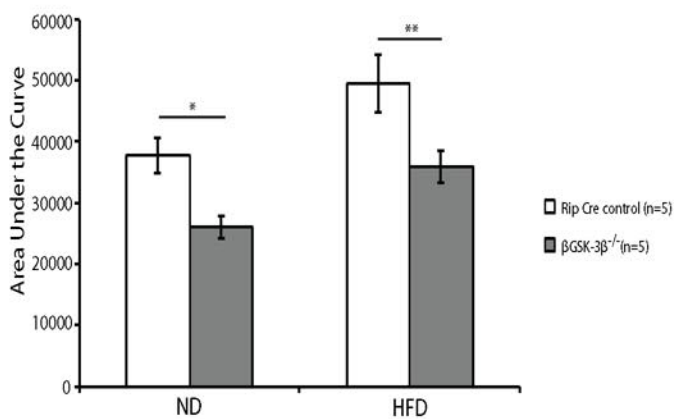

C

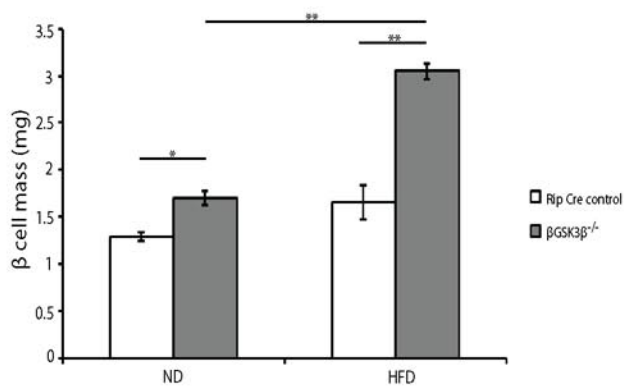

Supplement: NIHMS233234-supplement-6.pdf [file NIHMS233234-supplement-6.pdf]
